# Supplementary material
Source: publisher site journal article supplement (https://www.dovepress.com/article/451900)
Supplement: Supplementary file 1 [file get_supplementary_file.php]

**Supplementary Table 1** Relationship between the incidence of the primary endpoint and the AEC expressed as a continuous variable.

| **Variables** | **Univariate analysis** | | | **Multivariate analysis** | | |
| --- | --- | --- | --- | --- | --- | --- |
|  | **HR** | **95% CI** | **P-value** | **HR** | **95% CI** | **P-value** |
| AEC (109/L) | 6.284 | 2.037-19.381 | 0.001 | 11.555 | 3.318-40.239 | <0.001 |
| Age(yr) | 1.045 | 1.024-1.066 | <0.001 | 1.006 | 0.985-1.027 | 0.607 |
| Male sex, n (%) | 0.817 | 0.526-1.269 | 0.368 | 0.928 | 0.533-1.615 | 0.791 |
| Hypertension | 1.367 | 0.892-2.095 | 0.151 | 0.980 | 0.962-0.999 | 0.044 |
| Never smokers, n (%) | 1.469 | 0.995-2.170 | 0.053 | 1.725 | 1.120-2.658 | 0.013 |
| Diabetes | 1.312 | 0.888-1.939 | 0.173 | 0.541 | 0.212-1.383 | 0.199 |
| Cardiac failure, n (%) | 5.318 | 3.422-8.264 | <0.001 | 3.362 | 1.963-5.761 | <0.001 |
| Past PCI, n (%) | 2.007 | 1.324-3.042 | 0.001 | 1.626 | 0.774-3.417 | 0.200 |
| Previous MI, n (%) | 1.642 | 1.062-2.538 | 0.026 | 0.833 | 0.476-1.457 | 0.522 |
| PAD, n (%) | 5.348 | 3.558-8.038 | <0.001 | 3.357 | 2.074-5.432 | <0.001 |
| SYNTAX score | 1.030 | 1.013-1.047 | <0.001 | 0.987 | 0.965-1.009 | 0.240 |
| hs-CRP (mg/L) | 1.046 | 1.021-1.071 | <0.001 | 1.015 | 0.982-1.051 | 0.376 |
| Complete revascularization, n (%) | 0.437 | 0.294-0.649 | <0.001 | 1.168 | 1.048-1.301 | 0.005 |

**Supplementary Table 2** Relationship between the incidence of the primary endpoint and the PCI expressed as a continuous variable.

|  | Transradial coronary intervention  (n=1684) | Transfemoral coronary intervention (n=25) | P value |
| --- | --- | --- | --- |
| MACCEs, n (%) | 98 (5.8) | 2 (8.0) | 0.645 |
